# Supplementary material for: Heavy metal sorption properties of magnesium titanate mesoporous nanorods
Source: Royal Society of Chemistry journal article supplement (doi:10.1039/c5ta02034d), 2015-01-01
Supplement: c5ta02034d1.pdf [file c5ta02034d1.pdf]

### Electronic Supplementary Information

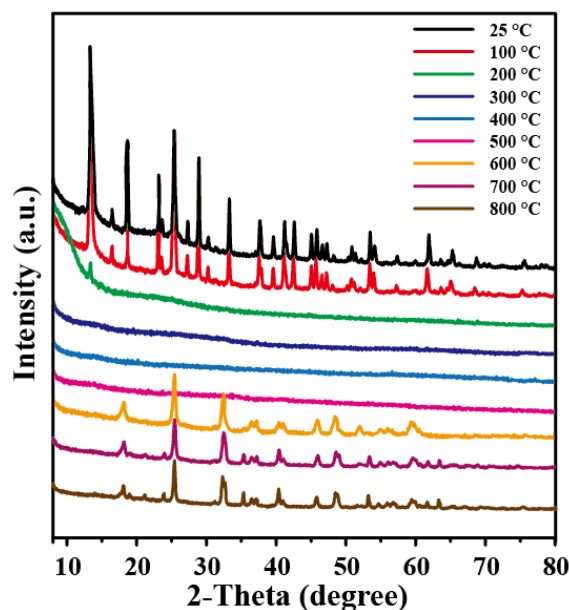

Fig. S1. In-situ XRD patterns of Ti/Mg-3/1 precursors with changed temperature from room temperature to 800 °C.

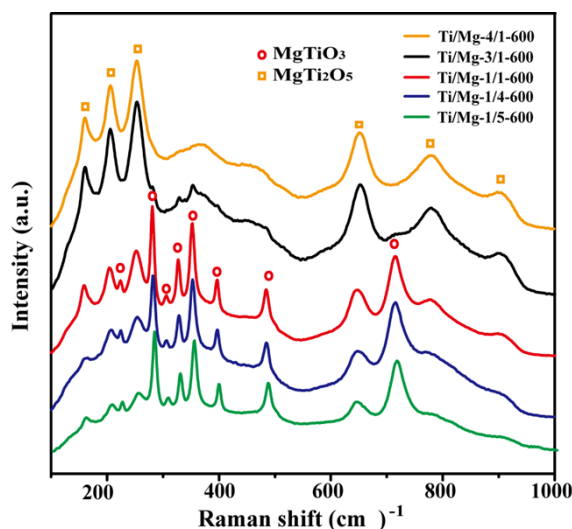

Fig. S2. Raman spectra of Ti/Mg-600 system.

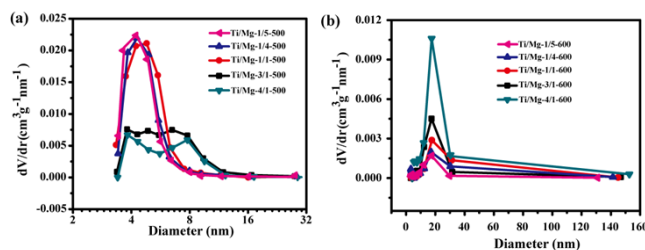

Fig. S3 Pore size distribution profiles of (a) Ti/Mg-500 system and (b) Ti/Mg-600 system.

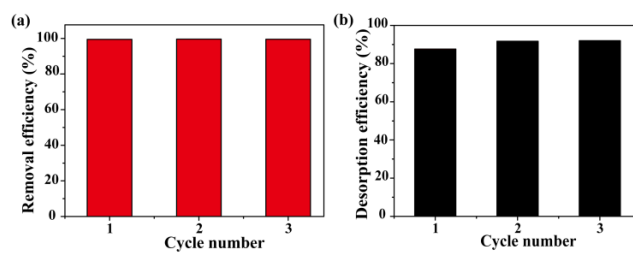

Fig. S4 (a) Pb<sup>2+</sup> adsorption and (b) desorption efficiency in 3 cycles, the Pb<sup>2+</sup> ion concentration is 20 mg·L<sup>-1</sup> and adsorbent dose is 25 mg /30 mL.

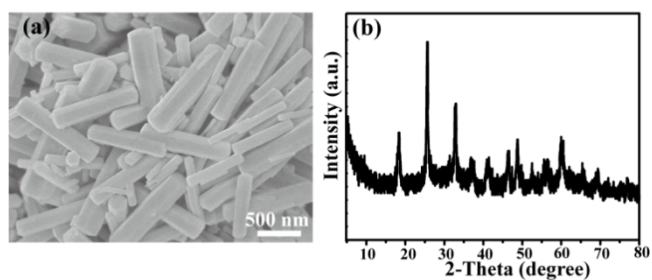

Fig. S5 (a) SEM image and XRD pattern of the used adsorbent Ti/Mg-3/1-500.
